# Supplementary material for: Enhanced photocatalytic activity and ultra-sensitive benzaldehyde sensing performance of a SnO2·ZnO·TiO2 nanomaterial
Source: Royal Society of Chemistry journal article supplement (doi:10.1039/c8ra05182h), 2018-01-01
Supplement: c8ra05182h1.pdf [file c8ra05182h1.pdf]

### Supplementary materials

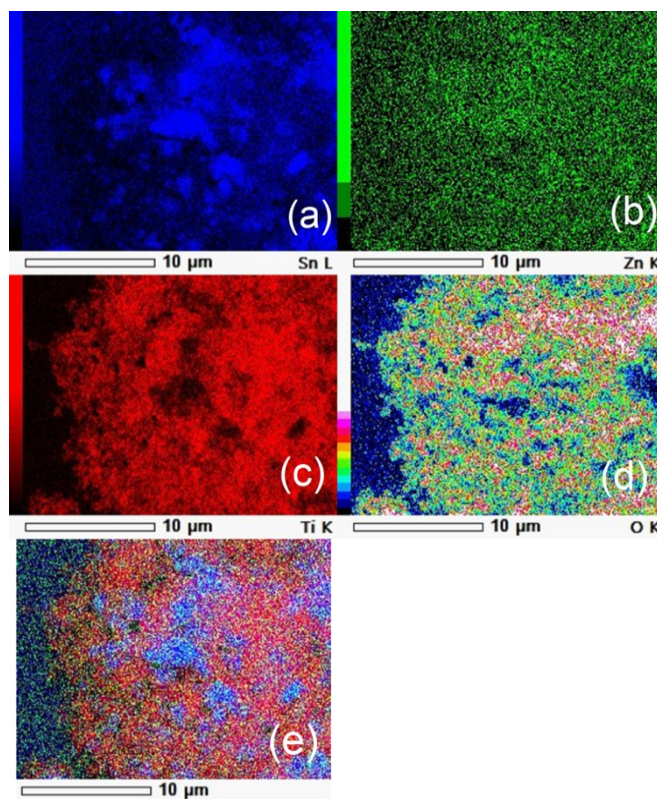

**Fig. S1:** SEM-EDS mapping of SnO<sub>2</sub>·ZnO·TiO<sub>2</sub> nanocomposites

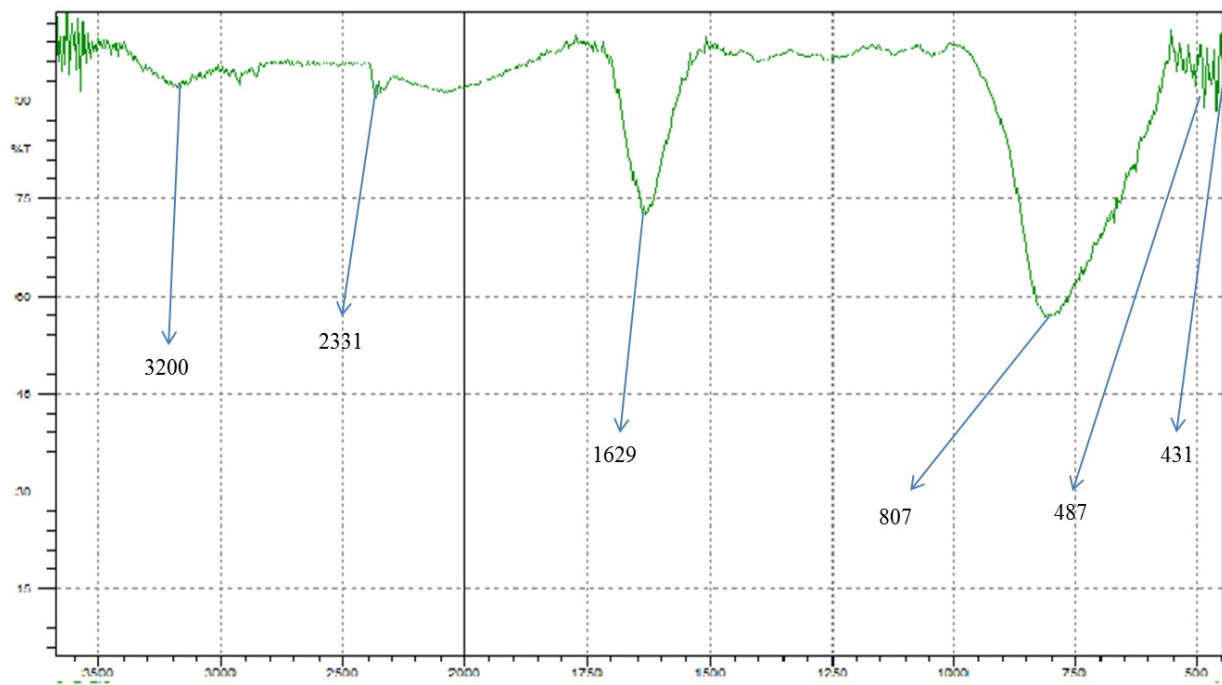

**Fig. S2:** FTIR spectra of SnO·ZnO·TiO<sub>2</sub> tri-metallic nanoparticles heated at 650 °C

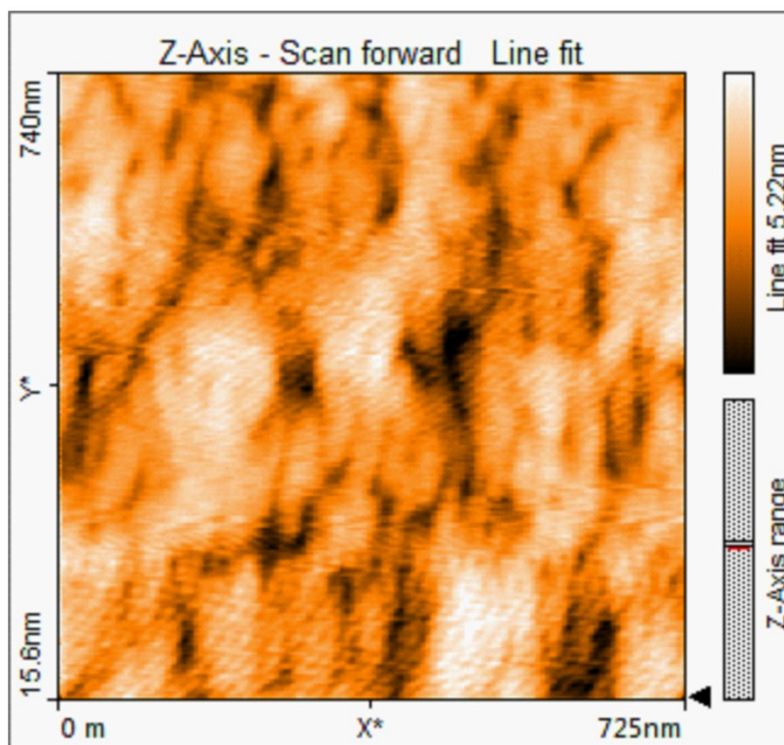

**Fig. S3:** 2D topological AFM image analysis of SnO·ZnO·TiO<sub>2</sub> nanocomposite film on glass surface

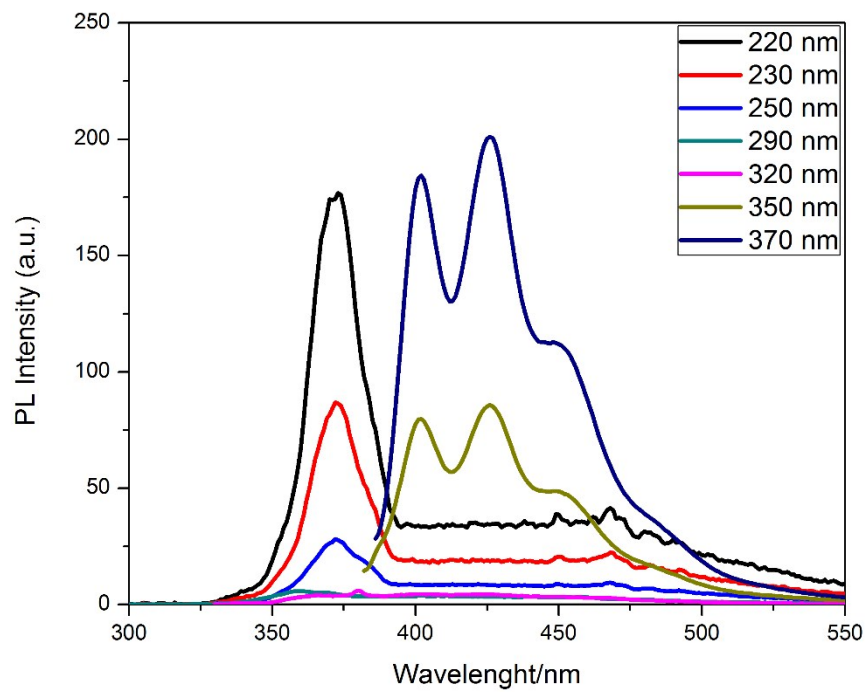

**Fig. S4:** PL spectra of SnO·ZnO·TiO<sub>2</sub> nanocomposites

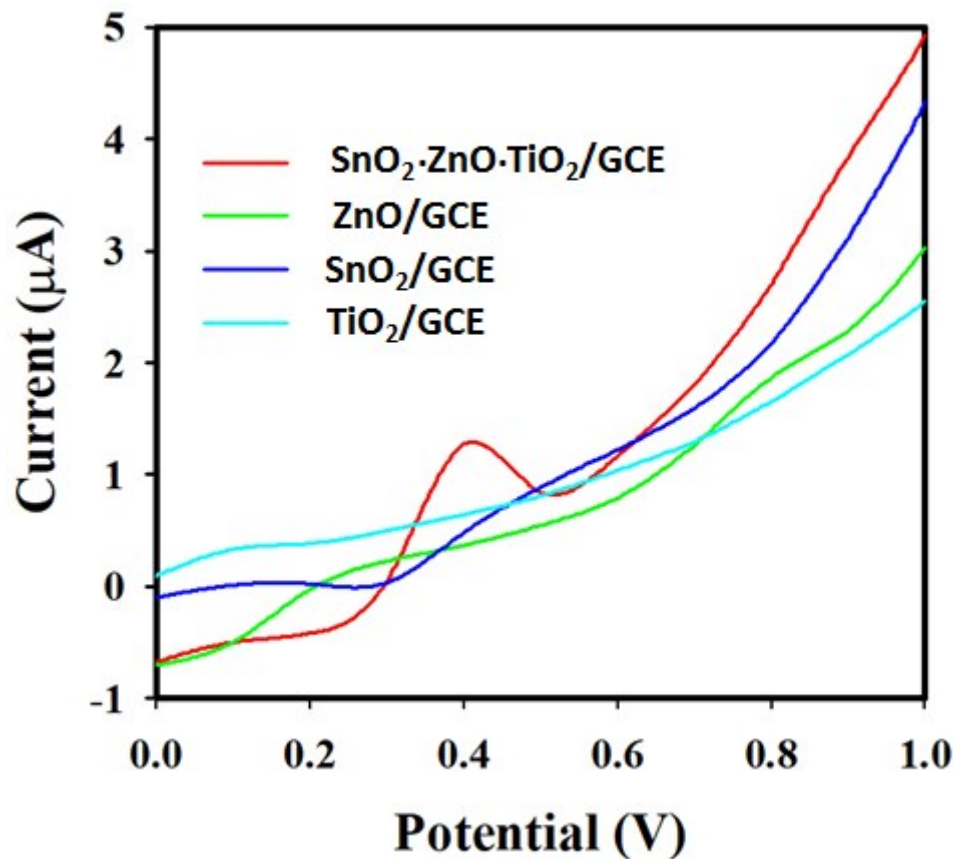

**Fig. S5.** Control experiment: Comparative study of single oxides with the  $\text{SnO}_2 \cdot \text{ZnO} \cdot \text{TiO}_2$  nanocomposites/Nafion/GCE fabricated electrodes under identical conditions.

Table S1: EDS data of  $\text{SnO}_2 \cdot \text{ZnO} \cdot \text{TiO}_2$  nanocomposite

| Element | (keV) | Mass% | Atom% |
|---------|-------|-------|-------|
| O K     | 0.525 | 33.38 | 69.16 |
| Ti K    | 4.508 | 29.1  | 20.13 |
| Zn K    | 8.63  | 1     | 0.51  |
| Sn L    | 3.442 | 36.52 | 10.2  |
| Total   |       | 100   | 100   |
